# Supplementary material for: Combining ReACp53 with Carboplatin to Target High-Grade Serous Ovarian Cancers
Source: MDPI journal article supplement (doi:10.3390/cancers13235908), 2021-11-24
Supplement: s1 [file s1]

## Supplementary Figure 9

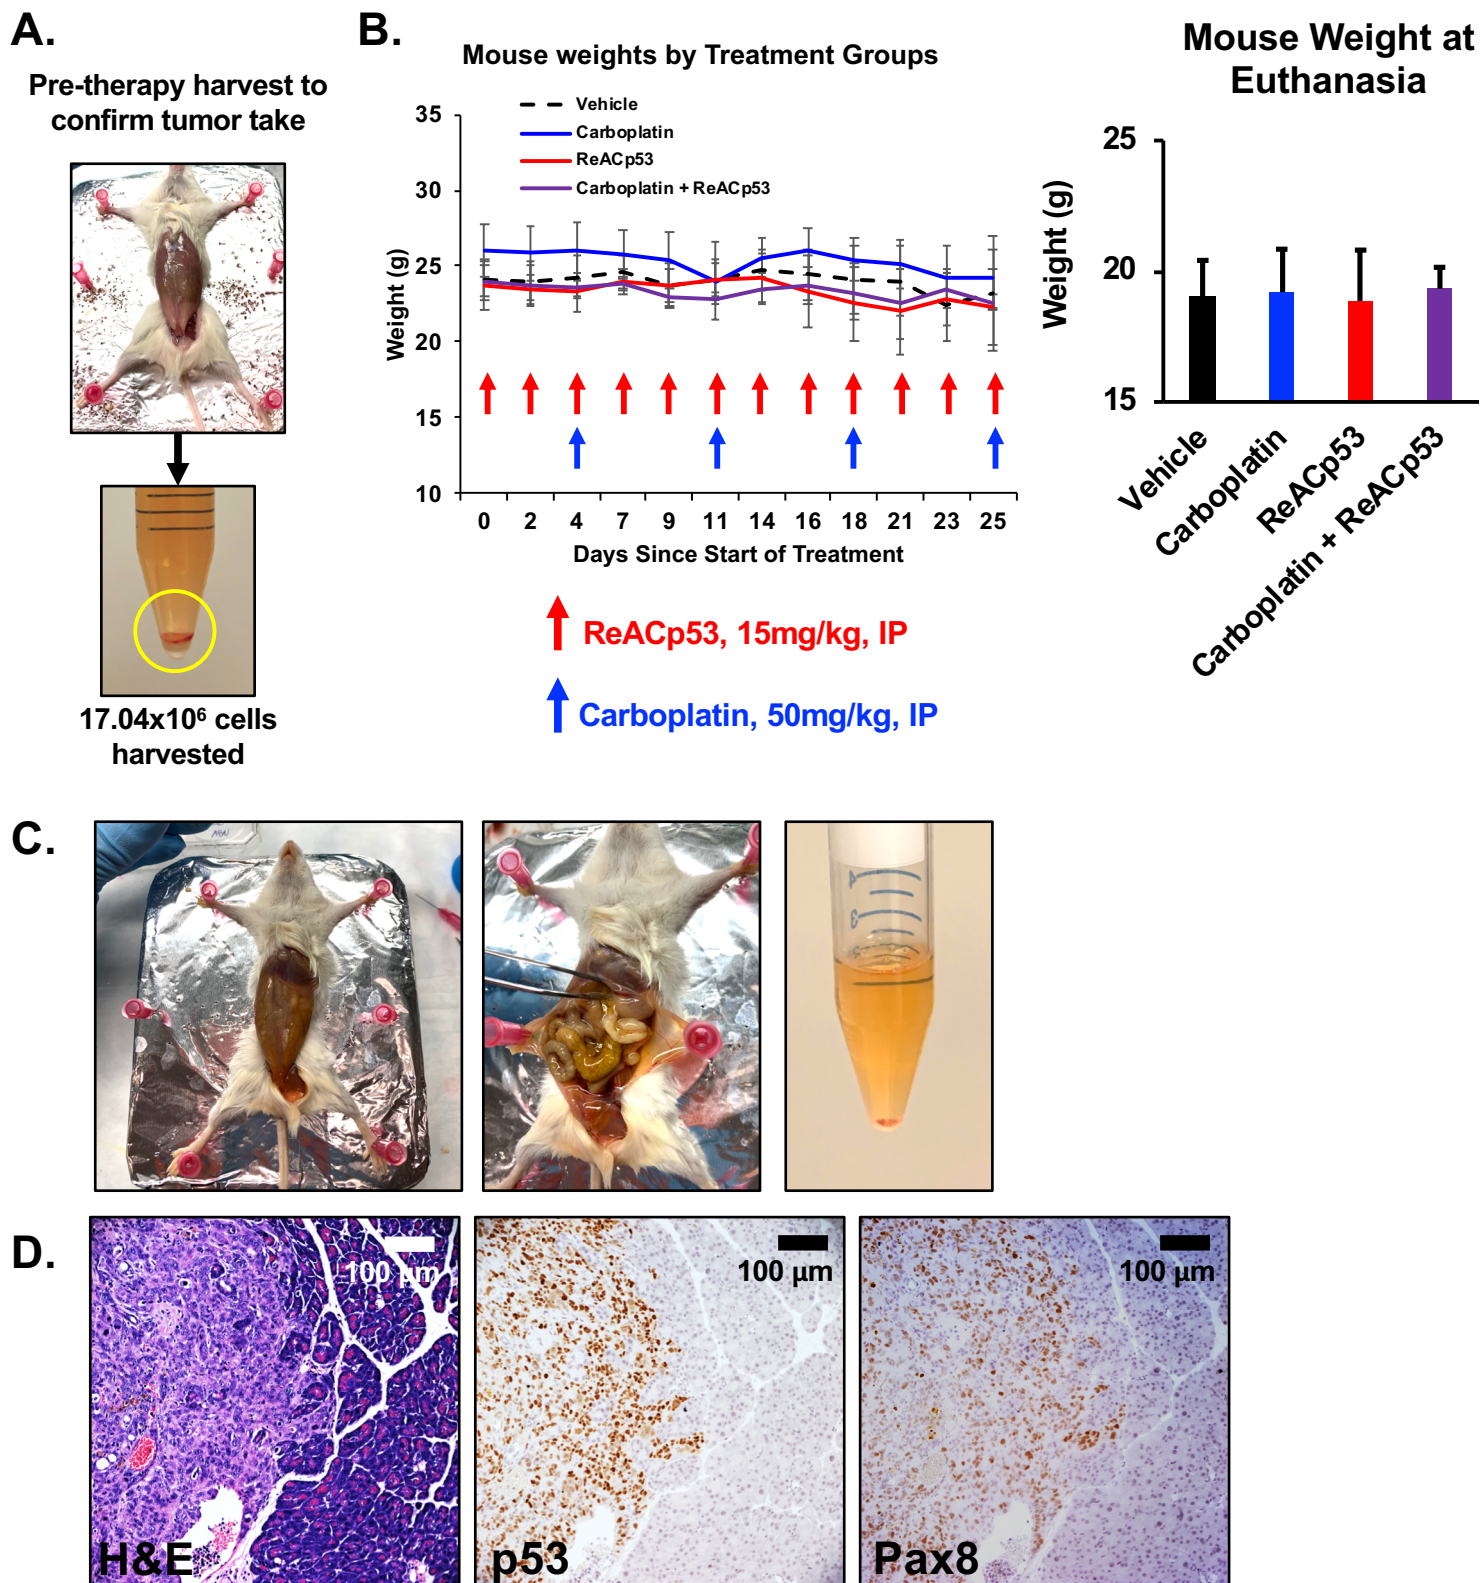

**Supplementary Figure 9. Survival of OVCAR8-bearing mice.** Mice were injected with  $3.0 \times 10^6$  OVCAR8 tumor cells (n=29) (A) One mouse was randomly selected and euthanized to confirm tumor take. (B) Remaining mice randomized to receive a four week course of either vehicle, ReACp53, carboplatin, or the ReACp53 and carboplatin combination (n=7 mice/treatment). Following treatment, therapy was stopped and mice were euthanized based on NIH-defined endpoint criteria. Mouse weights measured throughout treatment phase demonstrate an overall downward trend (line graph). Mice were weighted at endpoint (bar graph). (C) Representative images of mouse necropsy. Mice presented with a jaundiced appearance, low ascites burden, presence of intraperitoneal bilirubin, and notable gross tumor implants in some cases. (D) Representative images of tumor organ implants. Pax8 and p53 immunostaining confirm presence of tumor cells.
