# Supplementary material for: Combining ReACp53 with Carboplatin to Target High-Grade Serous Ovarian Cancers
Source: MDPI journal article supplement (doi:10.3390/cancers13235908), 2021-11-24
Supplement: s1 [file s1]

# Supplementary Figure 10

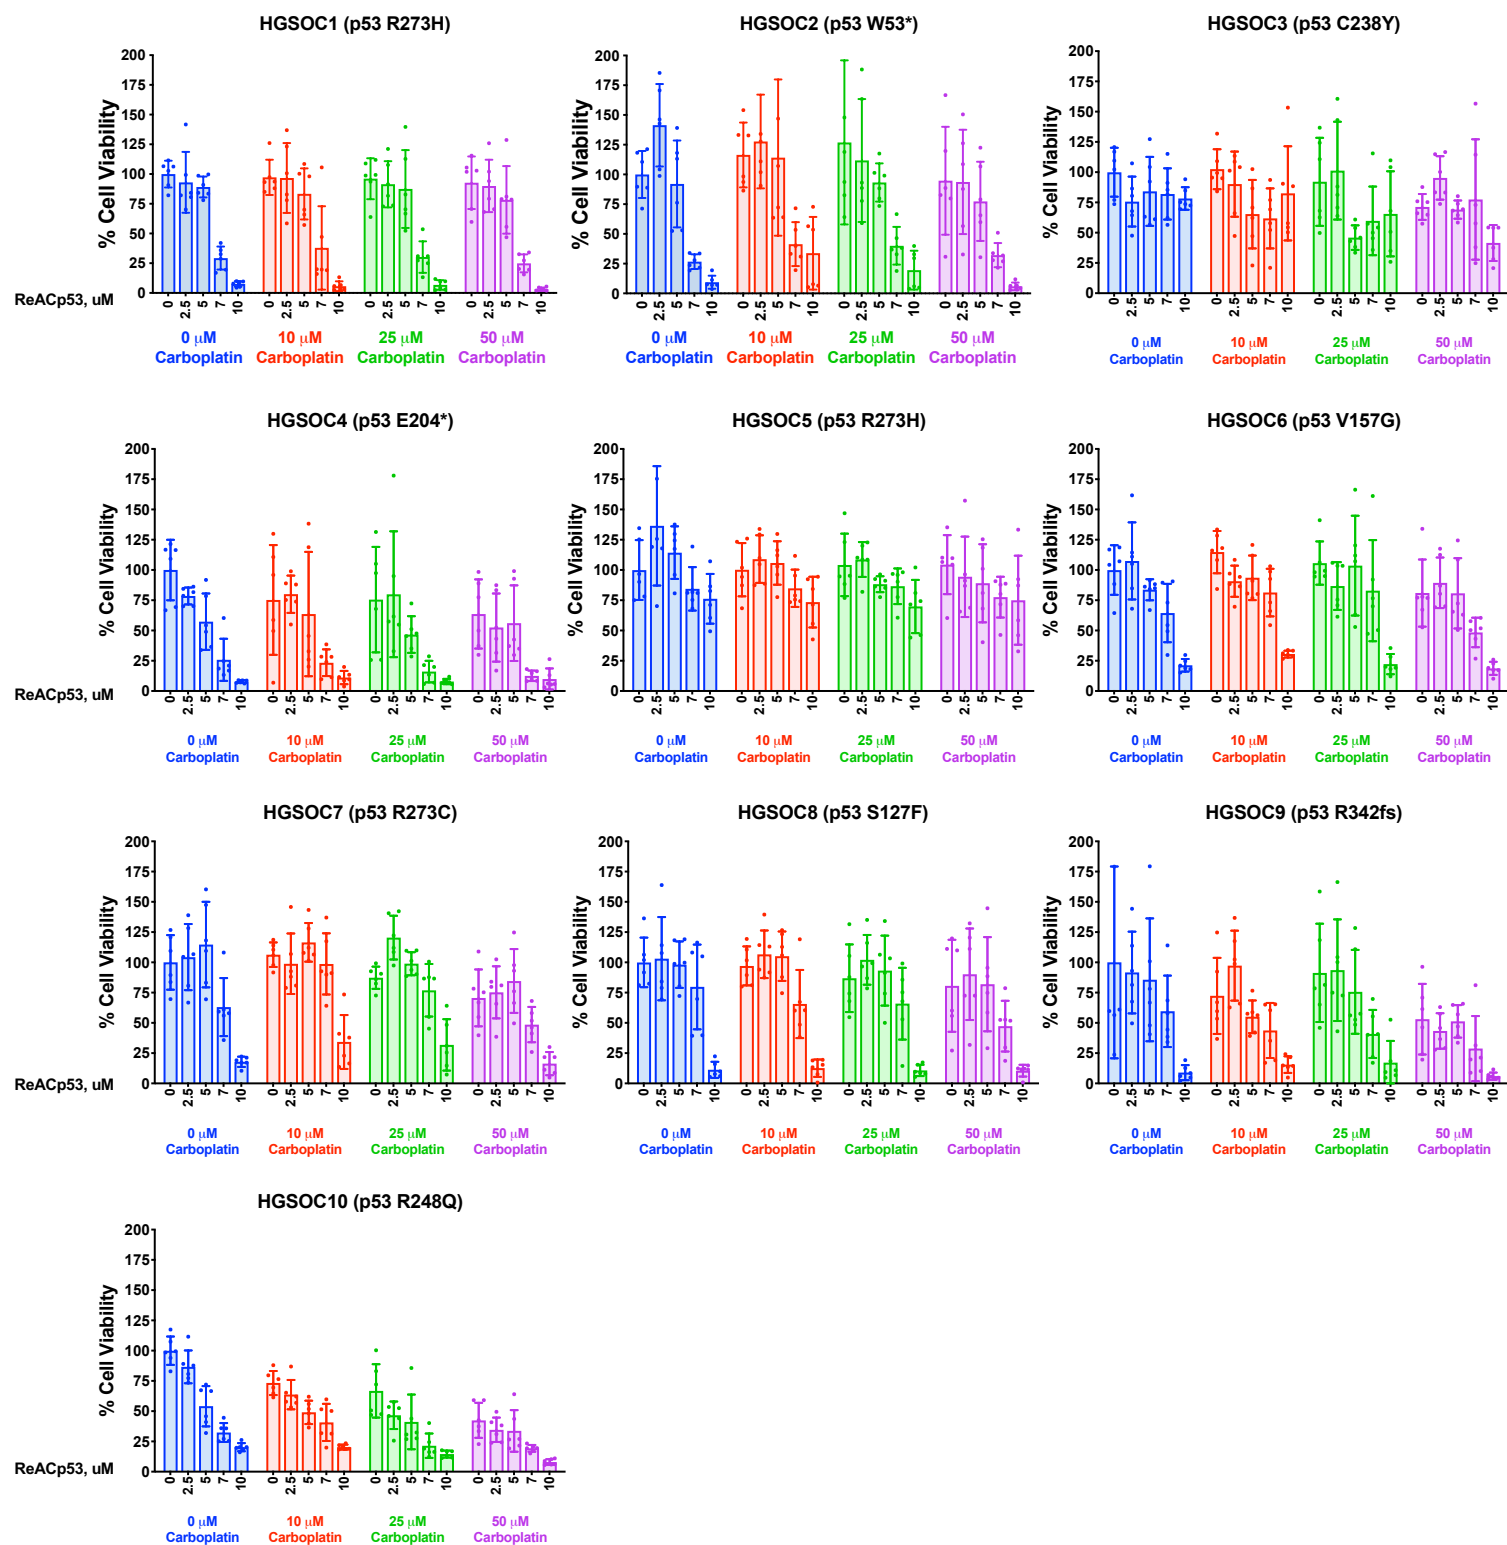

**Supplementary Figure 10. Viability plots for human HGSOC tumors treated with the ReACp53 and carboplatin combination using the in vitro 3D miniring organoid drug assay.** Individual cell viability data for all 10 primary patient HGSOC samples tested using the in vitro 3D miniring organoid drug assay. Data represents average measurements from 2 independent platings performed by separate investigators.
