# Supplementary material for: Combining ReACp53 with Carboplatin to Target High-Grade Serous Ovarian Cancers
Source: Cancers (Basel). 2021 Nov 24;13(23):5908. doi: 10.3390/cancers13235908 (PMC8657291; doi:10.3390/cancers13235908)
Supplement: Supplementary file 1 [file cancers-13-05908-s001.zip]

Archive with 11 entries (11 files):
- Supplemental Figure 1.pdf
- Supplemental Figure 10.pdf
- Supplemental Figure 11.pdf
- Supplemental Figure 2.pdf
- Supplemental Figure 3.pdf
- Supplemental Figure 4.pdf
- Supplemental Figure 5.pdf
- Supplemental Figure 6.pdf
- Supplemental Figure 7.pdf
- Supplemental Figure 8.pdf
- Supplemental Figure 9.pdf
